# Supplementary material for: A population-scale temporal case–control evaluation of COVID-19 disease phenotype and related outcome rates in patients with cancer in England (UKCCP)
Source: PubMed Central journal article supplement (PMC10368624; doi:10.1038/s41598-023-36990-9), 2023-07-25

# COVID-19 vaccination uptake

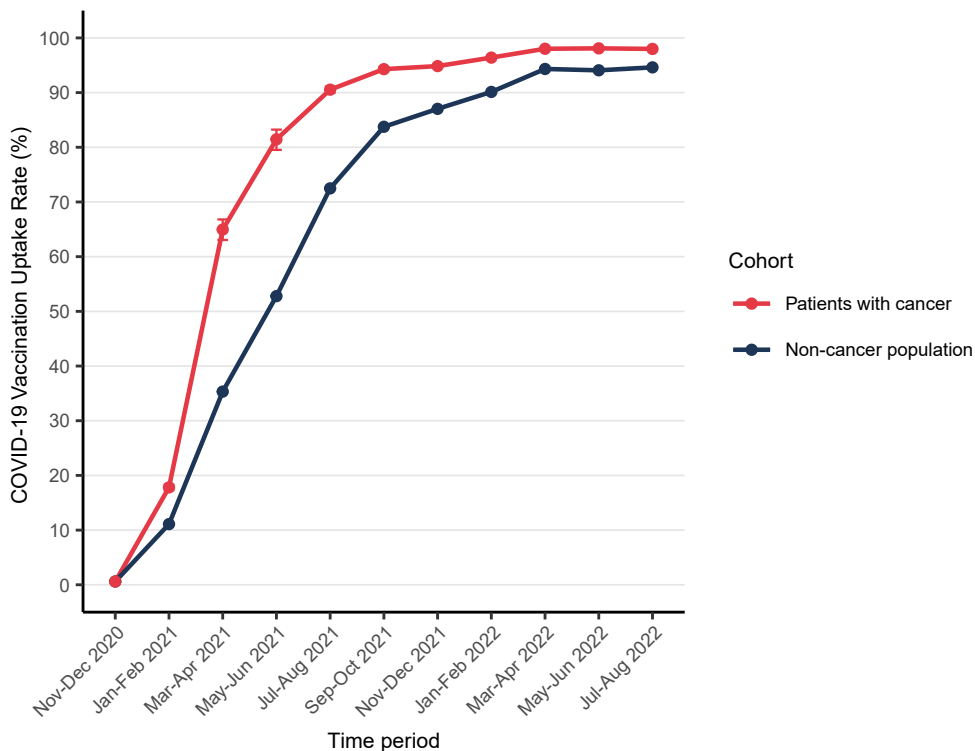

Supplement: 41598_2023_36990_MOESM3_ESM.pdf [file 41598_2023_36990_MOESM3_ESM.pdf]
